# Supplementary material for: Ethnicity Modifies the Relationships of Insulin Resistance, Inflammation, and Adiponectin With Obesity in a Multiethnic Asian Population
Source: PubMed Central journal article supplement — Diabetes Care. 2011 Apr 20;34(5):1120–6. doi: 10.2337/dc10-2097 (PMC3114514; doi:10.2337/dc10-2097), 2011-04-20

SUPPLEMENTARY DATA

**Supplementary Table 1. Effect of ethnicity on the relationship between BMI and insulin resistance, C-reactive protein and adiponectin.**

|                            | Ln (Insulin resistance) |         |         |         | Ln (C-reactive protein) |         |         |         | Ln (adiponectin) |         |         |         |
|----------------------------|-------------------------|---------|---------|---------|-------------------------|---------|---------|---------|------------------|---------|---------|---------|
|                            | Men                     |         | Women   |         | Men                     |         | Women   |         | Men              |         | Women   |         |
|                            | $\beta$                 | P value | $\beta$ | P value | $\beta$                 | P value | $\beta$ | P value | $\beta$          | P value | $\beta$ | P value |
| <b>Chinese</b>             | -                       | -       | -       | -       | -                       | -       | -       | -       | -                | -       | -       | -       |
| <b>Malay</b>               | 0.259                   | 0.258   | 0.744   | <0.001  | 0.763                   | 0.022   | 1.079   | 0.001   | -0.545           | 0.001   | -0.364  | 0.016   |
| <b>Asian Indian</b>        | 0.432                   | 0.082   | 1.020   | <0.001  | 0.574                   | 0.112   | 1.423   | <0.001  | -0.606           | 0.001   | -0.787  | <0.001  |
| <b>BMI</b>                 | 0.110                   | <0.001  | 0.094   | <0.001  | 0.098                   | <0.001  | 0.139   | <0.001  | -0.046           | <0.001  | -0.051  | <0.001  |
| <b>BMI*Malay</b>           | -0.010                  | 0.269   | -0.031  | <0.001  | -0.020                  | 0.124   | -0.039  | <0.001  | 0.023            | 0.001   | 0.019   | 0.001   |
| <b>BMI*Asian Indian</b>    | -0.004                  | 0.674   | -0.030  | <0.001  | -0.007                  | 0.611   | -0.039  | 0.002   | 0.024            | 0.002   | 0.031   | <0.001  |
| <b>Constant</b>            | -2.700                  | <0.001  | -2.292  | <0.001  | -2.886                  | <0.001  | -3.799  | <0.001  | 1.751            | <0.001  | 2.185   | <0.001  |
| <b>Model R<sup>2</sup></b> | 31.5                    |         | 36.5    |         | 17.7                    |         | 33.3    |         | 11.1             |         | 12.2    |         |

The analyses were adjusted for age. R<sup>2</sup> indicates the proportion of variance of the dependant variables attributable to ethnicity and BMI. BMI, body mass index;  $\beta$ , regression coefficient

**Supplementary Table 2. Effect of ethnicity on the relationship between waist circumference and insulin resistance, C-reactive protein and adiponectin.**

|                            | Ln (Insulin resistance) |         |         |         | Ln (C-reactive protein) |         |         |         | Ln (adiponectin) |         |         |         |
|----------------------------|-------------------------|---------|---------|---------|-------------------------|---------|---------|---------|------------------|---------|---------|---------|
|                            | Men                     |         | Women   |         | Men                     |         | Women   |         | Men              |         | Women   |         |
|                            | $\beta$                 | P value | $\beta$ | P value | $\beta$                 | P value | $\beta$ | P value | $\beta$          | P value | $\beta$ | P value |
| <b>Chinese</b>             | -                       | -       | -       | -       | -                       | -       | -       | -       | -                | -       | -       | -       |
| <b>Malay</b>               | 0.217                   | 0.490   | 0.774   | 0.001   | 0.825                   | 0.078   | 1.509   | <0.001  | -0.700           | 0.003   | -0.557  | 0.006   |
| <b>Asian Indian</b>        | 0.571                   | 0.076   | 0.950   | <0.001  | 1.127                   | 0.030   | 1.448   | 0.003   | -1.077           | <0.001  | -0.810  | <0.001  |
| <b>WC</b>                  | 0.043                   | <0.001  | 0.039   | <0.001  | 0.041                   | <0.001  | 0.057   | <0.001  | -0.019           | <0.001  | -0.022  | <0.001  |
| <b>WC*Malay</b>            | -0.002                  | 0.649   | -0.009  | 0.002   | -0.006                  | 0.270   | -0.016  | 0.033   | 0.008            | 0.002   | 0.008   | 0.001   |
| <b>WC*Asian Indian</b>     | -0.004                  | 0.293   | -0.008  | 0.005   | -0.009                  | 0.120   | -0.012  | 0.001   | 0.012            | <0.001  | 0.010   | <0.001  |
| <b>Constant</b>            | -3.5970                 | <0.001  | -3.012  | <0.001  | -3.909                  | <0.001  | -4.799  | <0.001  | 2.216            | <0.001  | 2.637   | <0.001  |
| <b>Model R<sup>2</sup></b> | 34.2                    |         | 39.3    |         | 19.0                    |         | 32.3    |         | 11.9             |         | 14.2    |         |

The analyses were adjusted for age. R<sup>2</sup> indicates the proportion of variance of the dependant variables attributable to ethnicity and waist circumference.

WC, waist circumference;  $\beta$ , regression coefficient

SUPPLEMENTARY DATA

**Supplementary Figure 1. Participant flow chart considered for inclusion in the study. The Singapore Prospective Study Program, 2004–2007.**

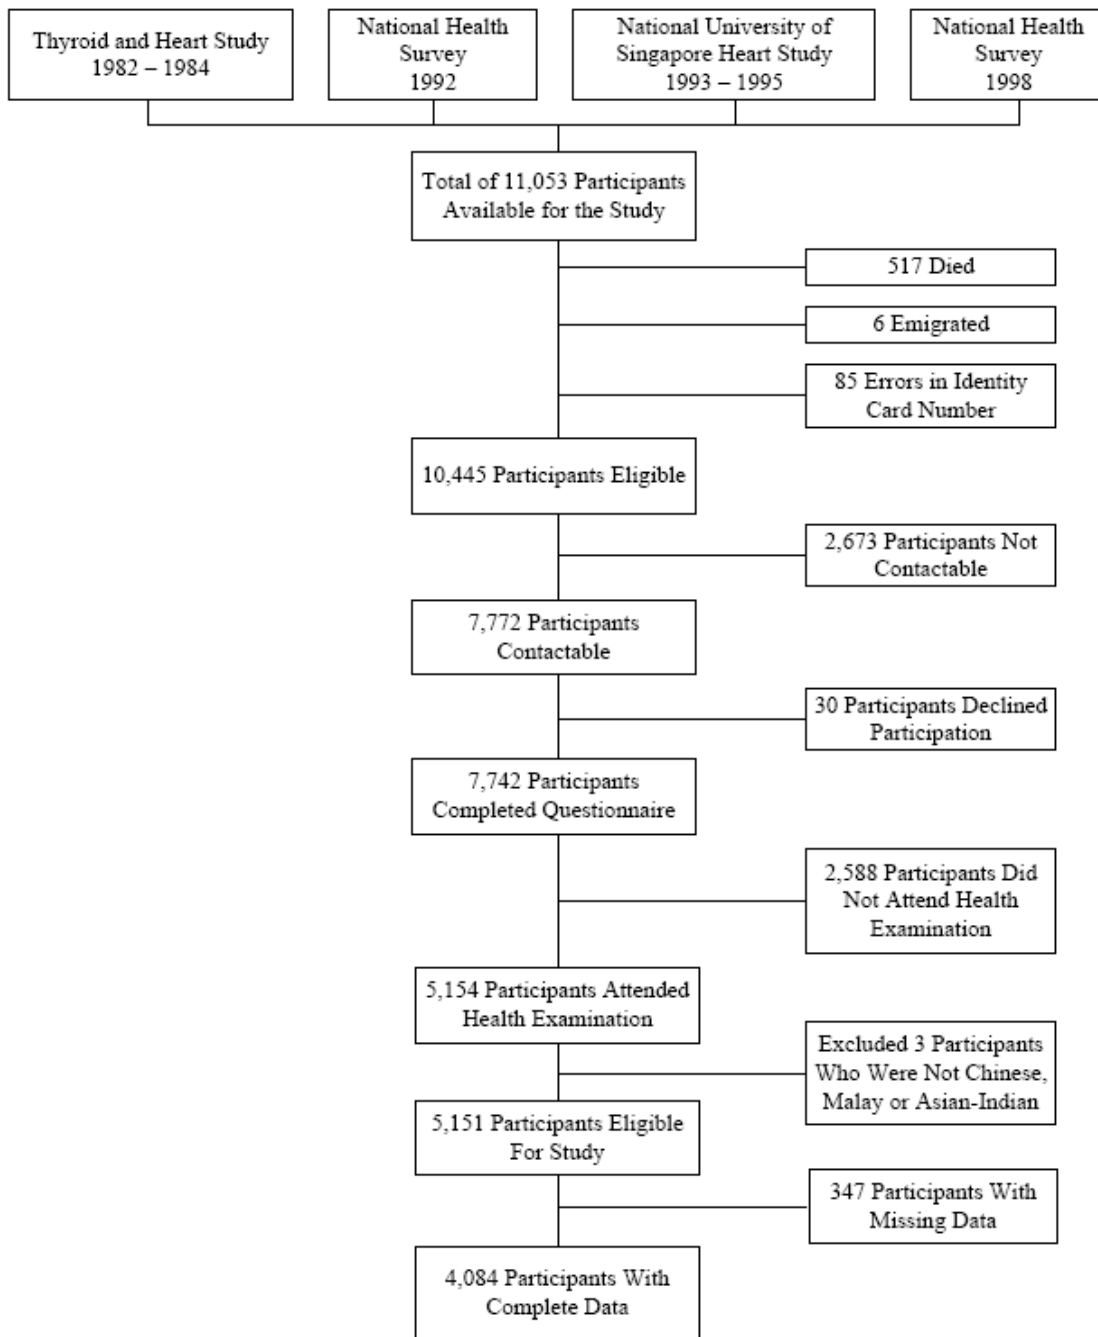

SUPPLEMENTARY DATA

**Supplementary Figure 2. Age-adjusted fitted regression plots showing relationships between body mass index (BMI) and insulin resistance (IR), C-reactive protein (CRP) and adiponectin in Men and  $\Delta$  Women, stratified by ethnic groups. A-2A, Relationship of insulin resistance to BMI in Chinese (P interaction=0.003). A-2B, Relationship of CRP to BMI in Chinese (P interaction<0.001). A-2C, Relationship of adiponectin to BMI in Chinese (P interaction=0.465). A-2D, Relationship of insulin resistance to BMI in Malays (P interaction <0.001). A-2E, Relationship of CRP to BMI in Malays (P interaction=0.138). A-2F, Relationship of adiponectin to BMI in Malays (P interaction=0.437). A-2G, Relationship of insulin resistance to BMI in Asian-Indians (P interaction =0.001). A-2H, Relationship of CRP to BMI in Asian-Indians (P interaction=0.451). A-2I, Relationship of adiponectin to BMI in Asian-Indians (P interaction=0.682).**

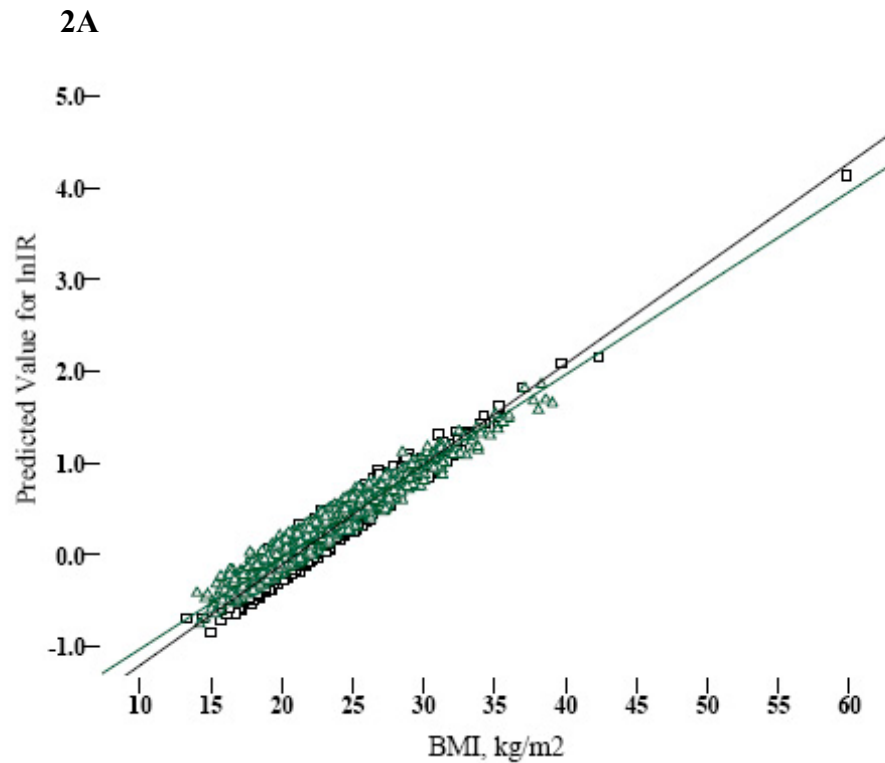

SUPPLEMENTARY DATA

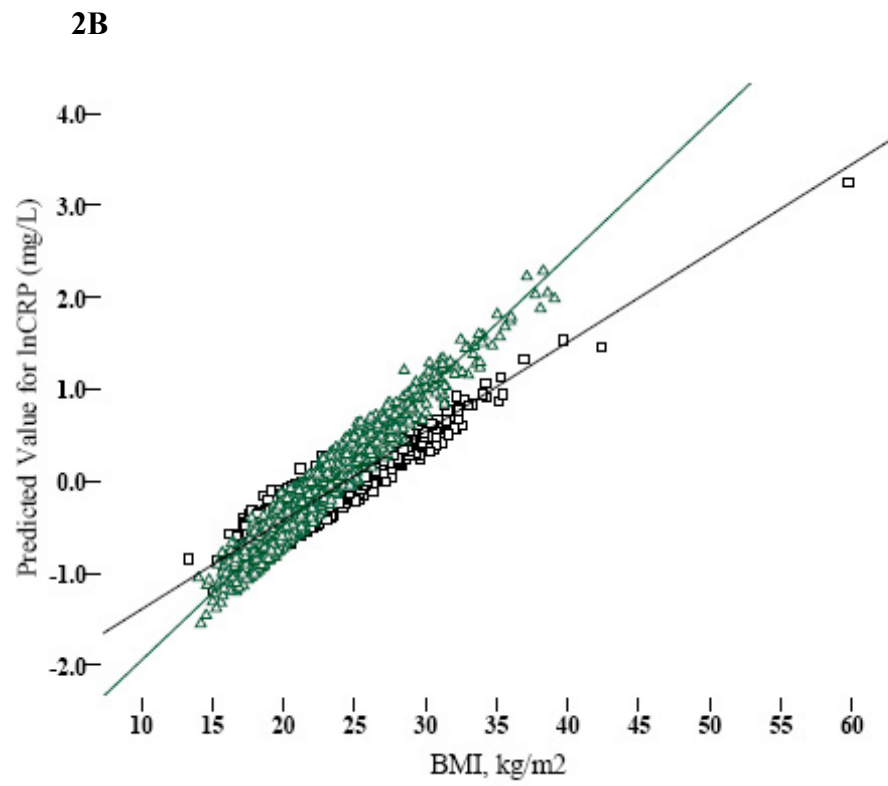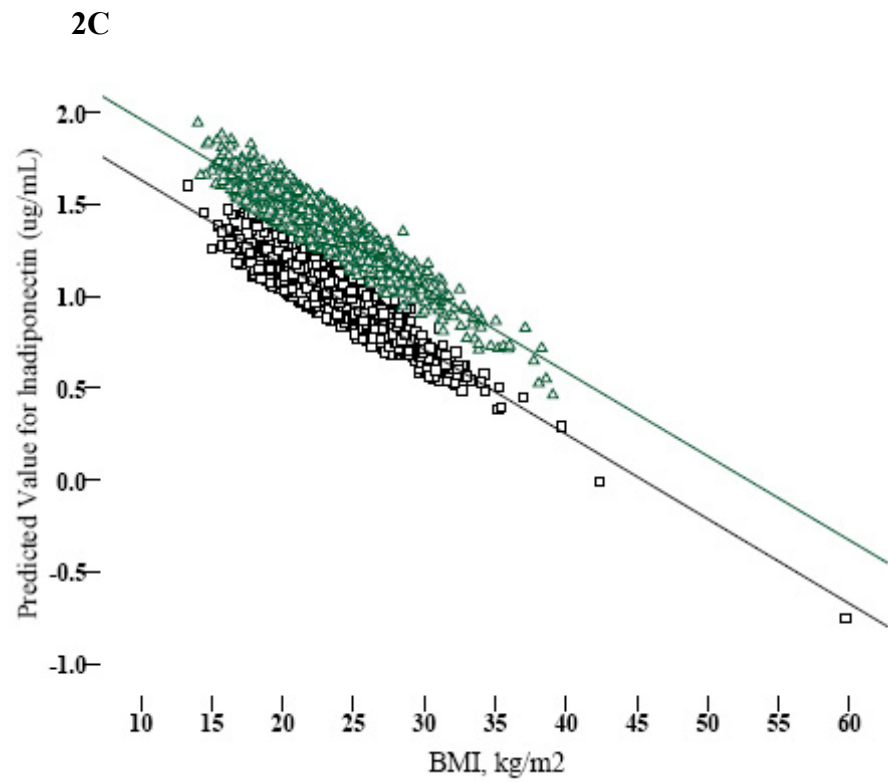

SUPPLEMENTARY DATA

2D

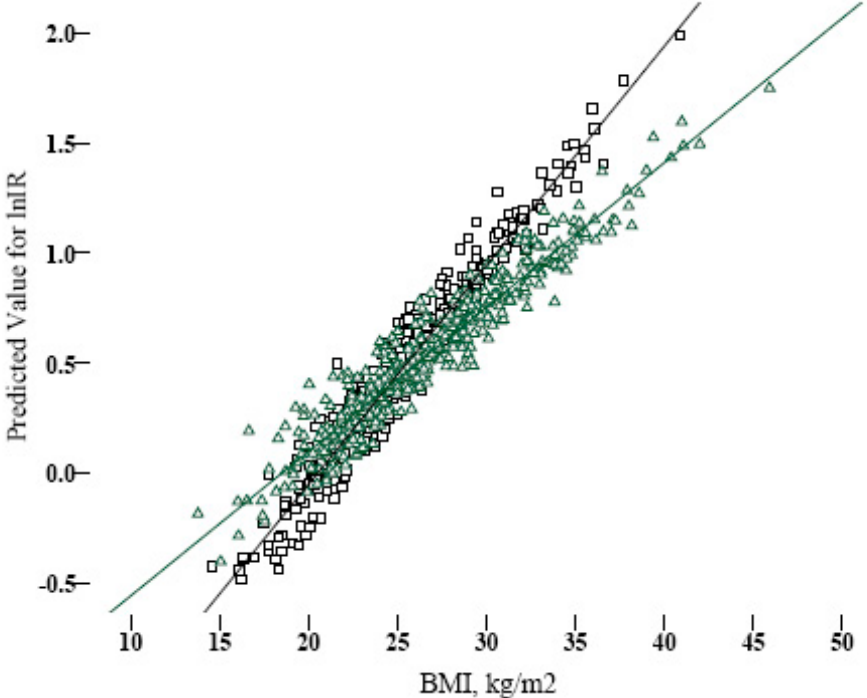

2E

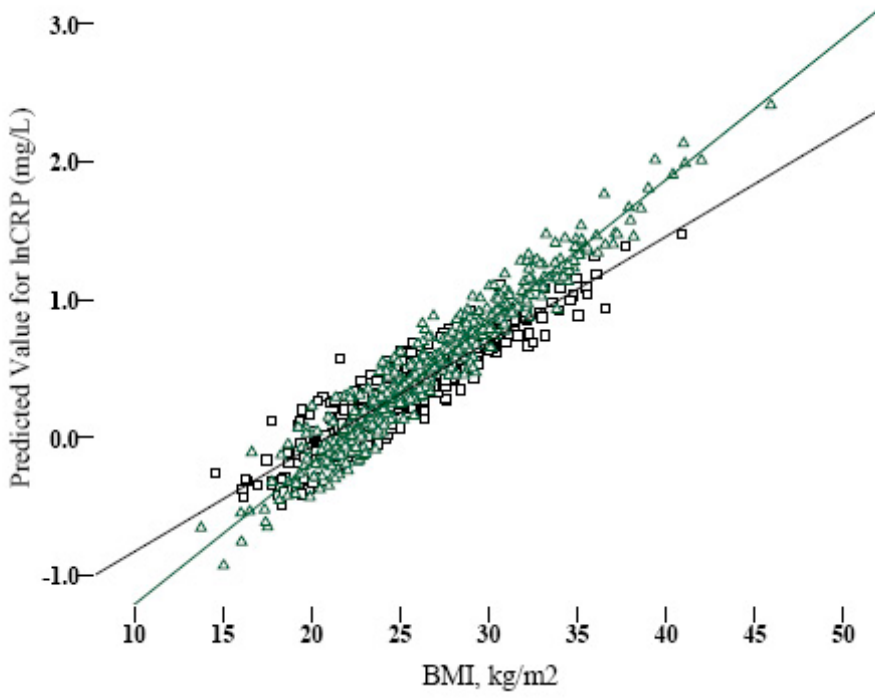

SUPPLEMENTARY DATA

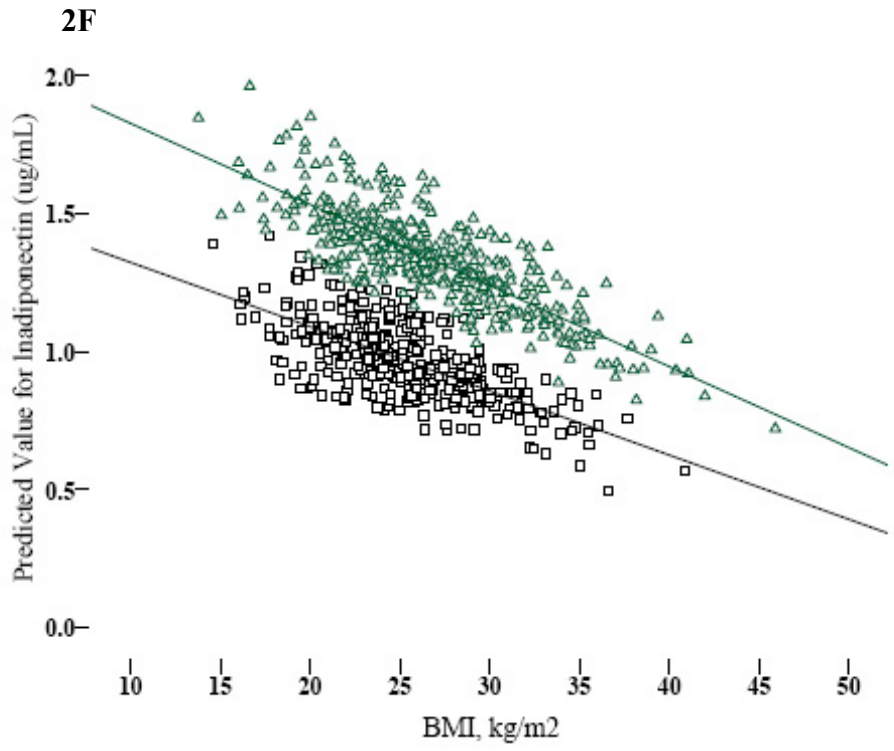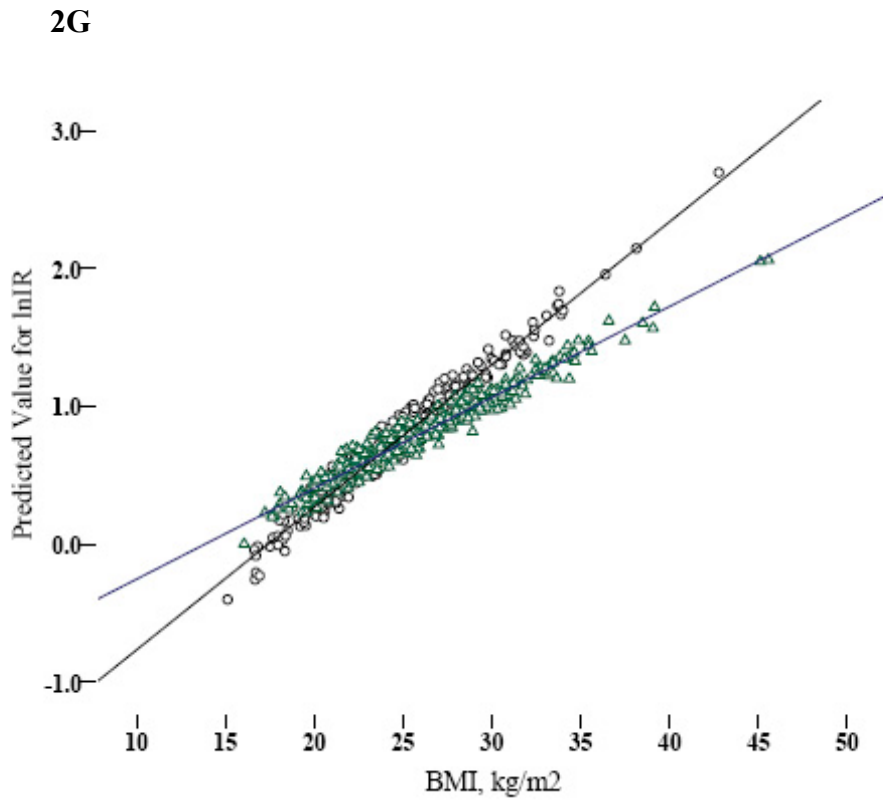

SUPPLEMENTARY DATA

2H

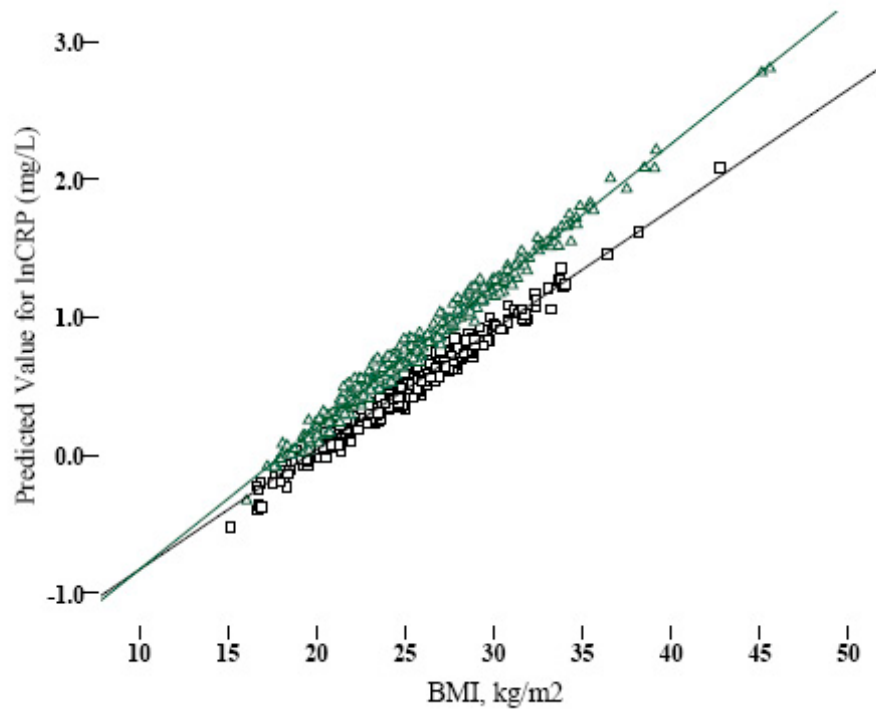

2I

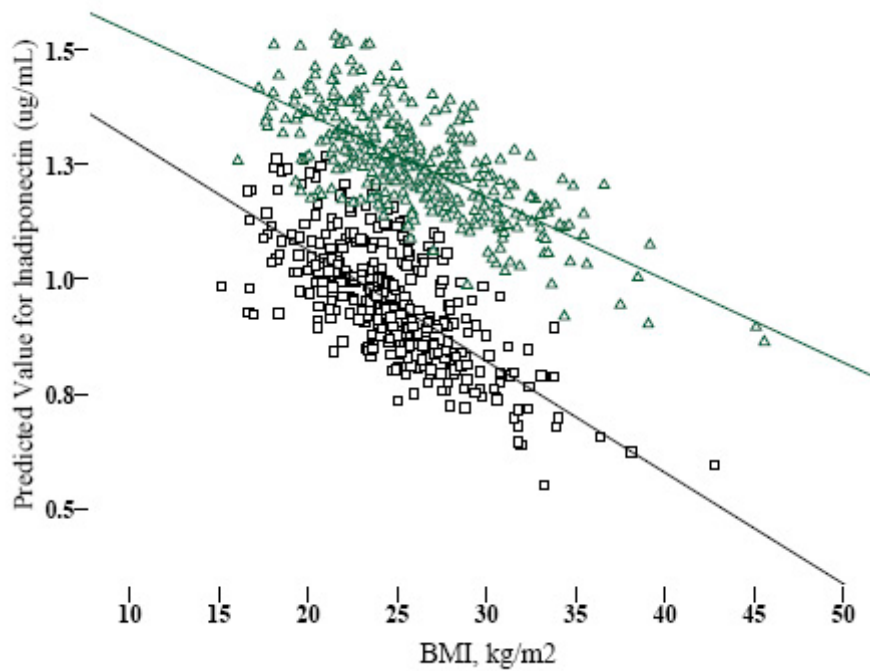

SUPPLEMENTARY DATA

**Supplementary Figure 3. Age-adjusted fitted regression plots showing relationships between waist circumference and insulin resistance (IR), C-reactive protein (CRP) and adiponectin in **O** Chinese, **△** Malays and **■** Asian-Indians, stratified by gender. A-3A, Relationship of insulin resistance to waist circumference in men (P interaction=0.566). A-3B, Relationship of insulin resistance to waist circumference in women (P interaction =0.001). A-3C, Relationship of CRP to waist circumference in men (P interaction=0.226). A-3D, Relationship of CRP to waist circumference in women (P interaction=0.002). A-3E, Relationship of adiponectin to waist circumference in men (P interaction<0.001). A-3F, Relationship of adiponectin to waist circumference in women (P interaction<0.001).**

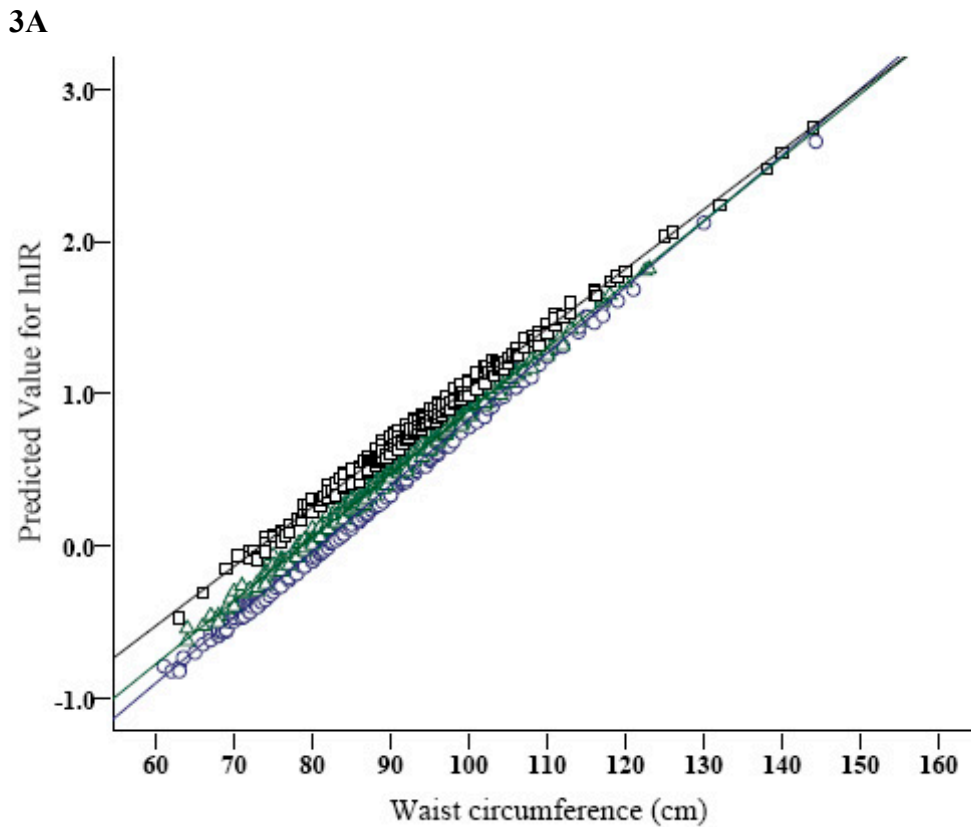



SUPPLEMENTARY DATA

3B

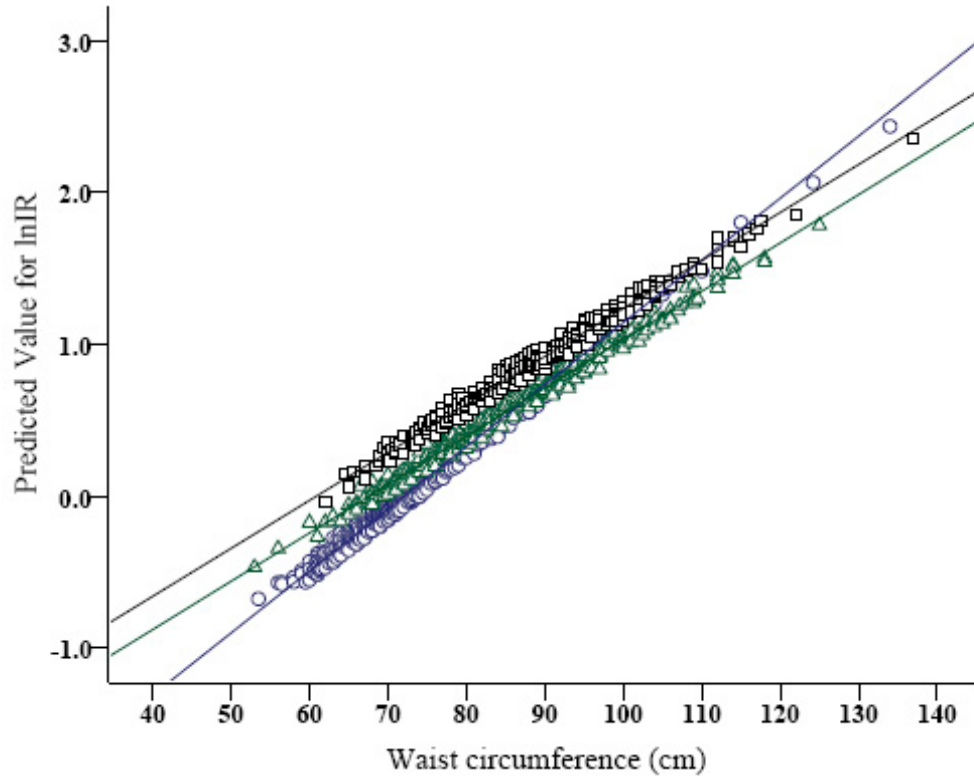

3C

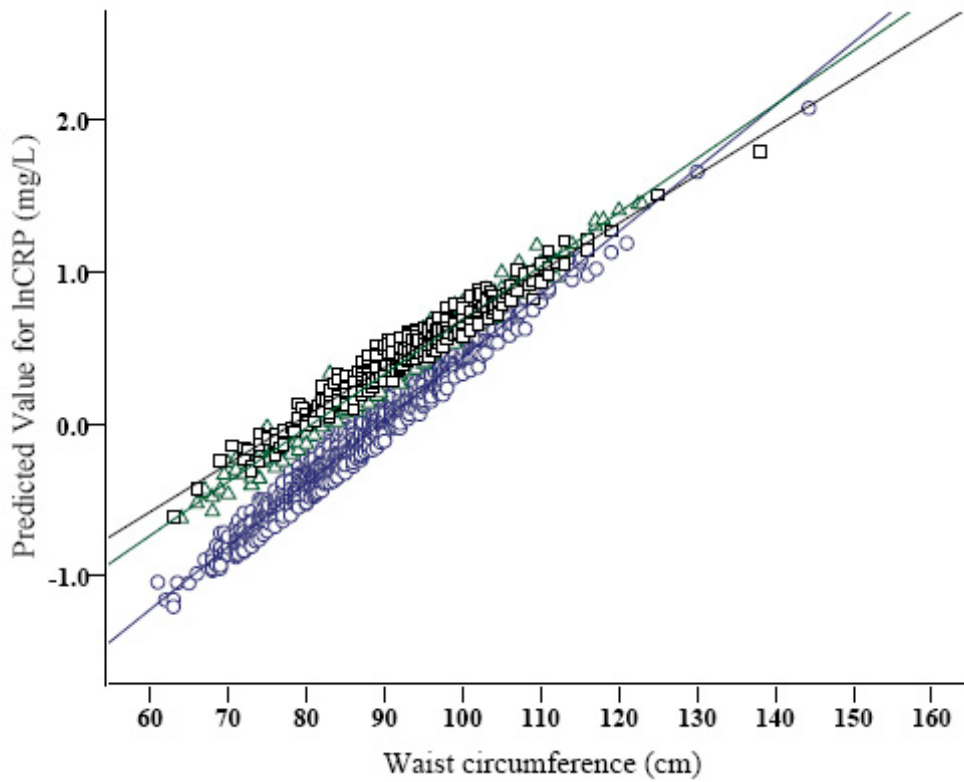

SUPPLEMENTARY DATA

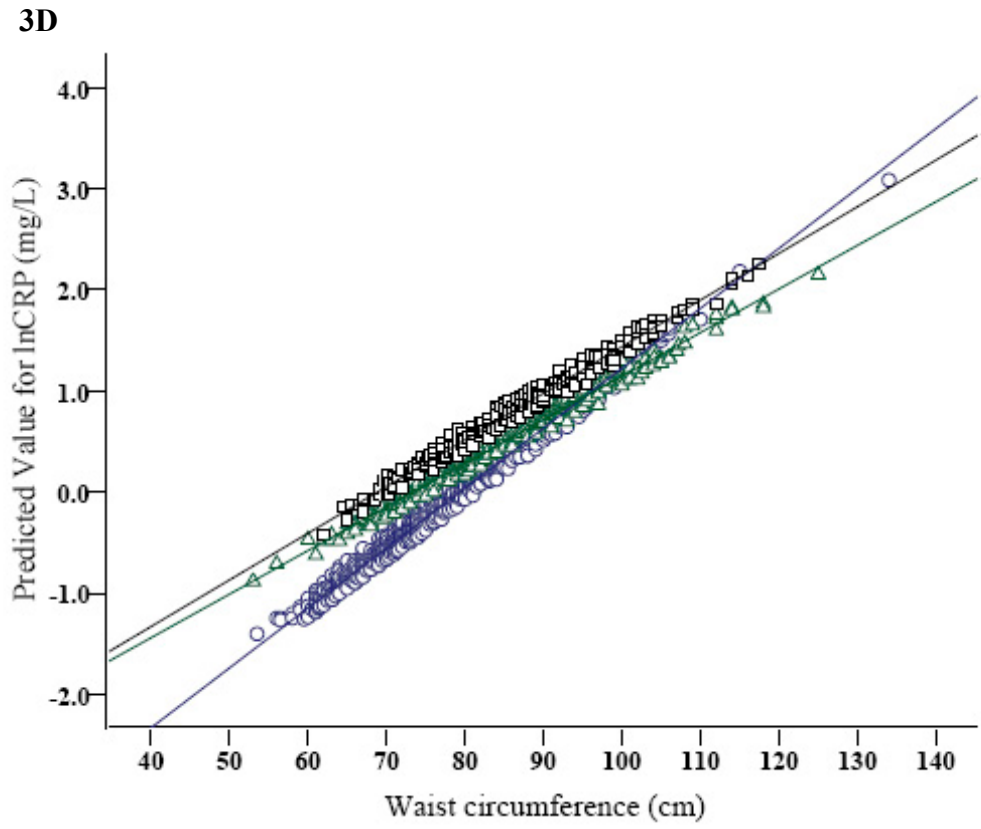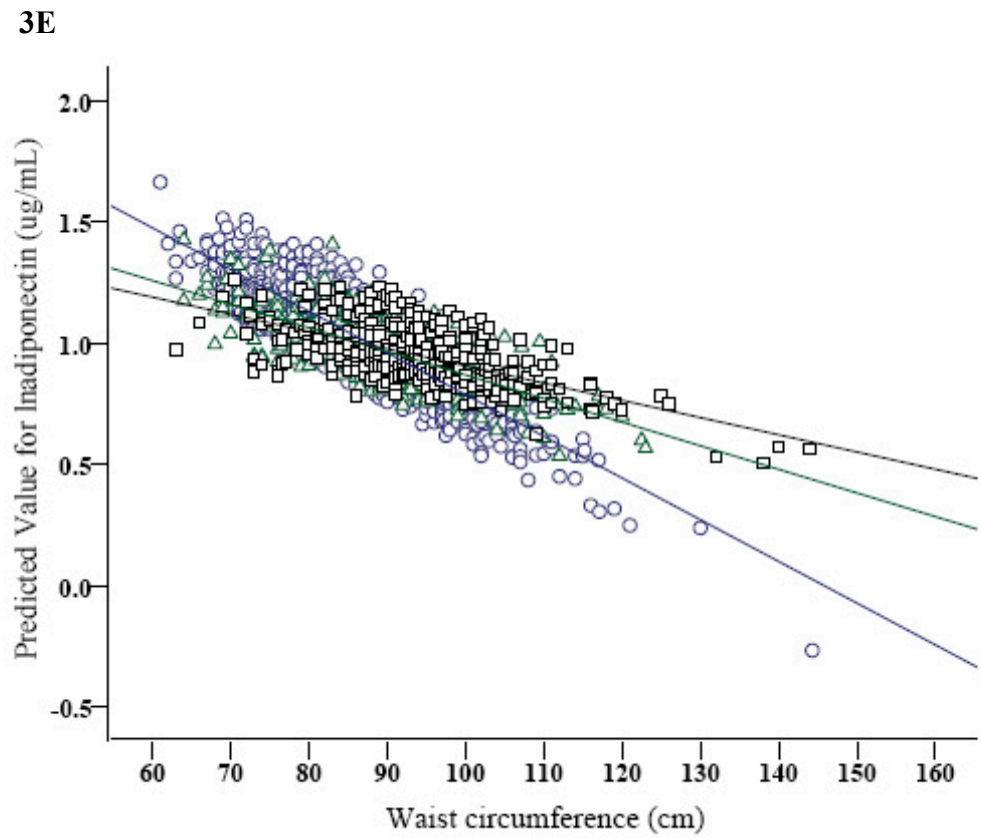

3F

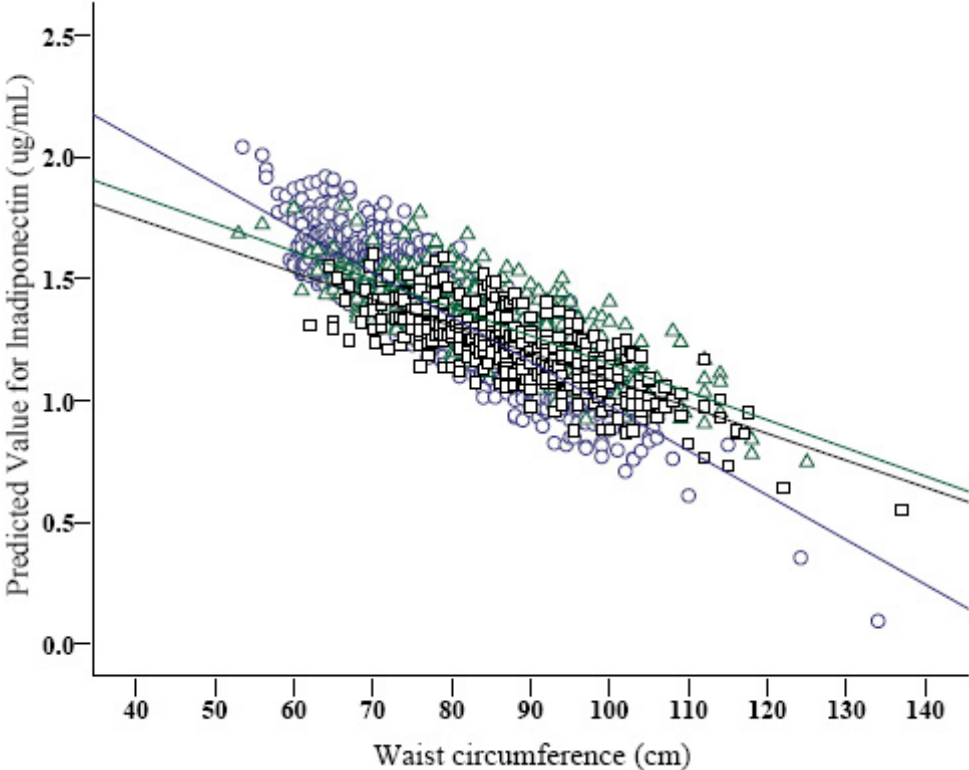

Supplement: supp_dc10-2097v102097_DC102097SupplementaryData.pdf [file supp_dc10-2097v102097_DC102097SupplementaryData.pdf]
